# Supplementary material for: Water and ions in electrified silica nano-pores: a molecular dynamics study
Source: Royal Society of Chemistry journal article supplement (doi:10.1039/d4cp00750f), 2024-01-01
Supplement: d4cp00750f1.pdf [file d4cp00750f1.pdf]

## Supplementary Information

# Water and ions in electrified silica nano-pores: a molecular dynamics study

Mahdi Tavakol<sup>1,\*</sup> and Kislun Voitchovsky<sup>1,\*</sup>

1. Physics Department, Durham University, Durham DH1 3LE, UK

\*corresponding authors: [mahditavakol90@gmail.com](mailto:mahditavakol90@gmail.com) , [kislun.voitchovsky@durham.ac.uk](mailto:kislun.voitchovsky@durham.ac.uk)

### Content:

1. Simulation Setup Details (Table S1)
2. Convergence of the Dielectric Constant (Fig. S1)
3. Distribution of the water dipole in the x-direction of the surface (Figs. S2-S3)
4. Water dipole and ionic distributions in the gap at different applied voltages (Figs. S4-S9)
5. Water dipole and ionic distributions in the gap at different ionic concentrations (Figs S10-S15)
6. Lateral organisation of water molecules at the surface of silica (Fig. S16)

## 1. Simulation Setup Details

Table S1 – Details of the different simulations done in the current study.

| Run ID | Sim set | # of sims | Box Voltage | Gap Voltage | Ion conc. (M) | # silica slabs | Cations (#) | Anions (#) | Water (#) | Cumulat. time (ns) |
|--------|---------|-----------|-------------|-------------|---------------|----------------|-------------|------------|-----------|--------------------|
| 256    | 1       | 3         | 0           | 0           | 0             | 2              | 0           | 0          | 8000      | 30                 |
| 257    | 2       | 3         | 0           | 0           | 0.042         | 2              | 4           | 4          | 8000      | 30                 |
| 258    | 3       | 3         | 0           | 0           | 0.1           | 2              | 12          | 12         | 8000      | 30                 |
| 259    | 4       | 3         | 0           | 0           | 0.21          | 2              | 24          | 24         | 8000      | 30                 |
| 260    | 5       | 3         | 0           | 0           | 0.42          | 2              | 50          | 50         | 8000      | 30                 |
| 261    | 6       | 3         | 0           | 0           | 0.84          | 2              | 100         | 100        | 8000      | 30                 |
| 262    | 7       | 3         | 0           | 0           | 2             | 2              | 238         | 238        | 8000      | 30                 |
| 214    | 8       | 6         | 0.2         | 0.08        | 0             | 2              | 0           | 0          | 8000      | 60                 |
| 230    | 9       | 6         | 0.2         | 0.08        | 0.021         | 2              | 2           | 2          | 8000      | 60                 |
| 213    | 10      | 6         | 0.2         | 0.08        | 0.042         | 2              | 4           | 4          | 8000      | 60                 |
| 236    | 11      | 6         | 0.2         | 0.08        | 0.0565        | 2              | 6           | 6          | 8000      | 60                 |
| 212    | 12      | 6         | 0.2         | 0.08        | 0.1           | 2              | 12          | 12         | 8000      | 60                 |
| 211    | 13      | 6         | 0.2         | 0.08        | 0.21          | 2              | 24          | 24         | 8000      | 60                 |
| 210    | 14      | 6         | 0.2         | 0.08        | 0.42          | 2              | 50          | 50         | 8000      | 60                 |
| 209    | 15      | 6         | 0.2         | 0.08        | 0.84          | 2              | 100         | 100        | 8000      | 60                 |
| 221    | 16      | 6         | 0.2         | 0.08        | 2             | 2              | 238         | 238        | 8000      | 60                 |
| 220    | 17      | 6         | 0.5         | 0.2         | 0             | 2              | 0           | 0          | 8000      | 60                 |
| 231    | 18      | 6         | 0.5         | 0.2         | 0.021         | 2              | 2           | 2          | 8000      | 60                 |
| 219    | 19      | 6         | 0.5         | 0.2         | 0.042         | 2              | 4           | 4          | 8000      | 60                 |
| 237    | 20      | 6         | 0.5         | 0.2         | 0.0565        | 2              | 6           | 6          | 8000      | 60                 |
| 218    | 21      | 6         | 0.5         | 0.2         | 0.1           | 2              | 12          | 12         | 8000      | 60                 |
| 217    | 22      | 6         | 0.5         | 0.2         | 0.21          | 2              | 24          | 24         | 8000      | 60                 |
| 216    | 23      | 6         | 0.5         | 0.2         | 0.42          | 2              | 50          | 50         | 8000      | 60                 |
| 215    | 24      | 6         | 0.5         | 0.2         | 0.84          | 2              | 100         | 100        | 8000      | 60                 |
| 186    | 25      | 6         | 1           | 0.4         | 0             | 2              | 0           | 0          | 8000      | 60                 |
| 227    | 26      | 6         | 1           | 0.4         | 0.021         | 2              | 2           | 2          | 8000      | 60                 |
| 191    | 27      | 6         | 1           | 0.4         | 0.042         | 2              | 4           | 4          | 8000      | 60                 |
| 232    | 28      | 6         | 1           | 0.4         | 0.0565        | 2              | 6           | 6          | 8000      | 60                 |
| 190    | 29      | 6         | 1           | 0.4         | 0.1           | 2              | 12          | 12         | 8000      | 60                 |
| 189    | 30      | 6         | 1           | 0.4         | 0.21          | 2              | 24          | 24         | 8000      | 60                 |
| 188    | 31      | 6         | 1           | 0.4         | 0.42          | 2              | 50          | 50         | 8000      | 60                 |
| 182    | 32      | 6         | 1           | 0.4         | 0.84          | 2              | 100         | 100        | 8000      | 60                 |
| 223    | 33      | 6         | 1           | 0.4         | 2             | 2              | 238         | 238        | 8000      | 60                 |
| 201    | 34      | 6         | 5           | 2           | 0             | 2              | 0           | 0          | 8000      | 60                 |

|     |    |   |    |   |        |   |     |     |      |              |
|-----|----|---|----|---|--------|---|-----|-----|------|--------------|
| 238 | 35 | 6 | 5  | 2 | 0.021  | 2 | 2   | 2   | 8000 | 60           |
| 200 | 36 | 6 | 5  | 2 | 0.042  | 2 | 4   | 4   | 8000 | 60           |
| 233 | 37 | 6 | 5  | 2 | 0.0565 | 2 | 6   | 6   | 8000 | 60           |
| 243 | 38 | 6 | 5  | 2 | 0.1    | 2 | 12  | 12  | 8000 | 60           |
| 242 | 39 | 6 | 5  | 2 | 0.21   | 2 | 24  | 24  | 8000 | 60           |
| 241 | 40 | 6 | 5  | 2 | 0.42   | 2 | 50  | 50  | 8000 | 60           |
| 240 | 41 | 6 | 5  | 2 | 0.84   | 2 | 100 | 100 | 8000 | 60           |
| 224 | 42 | 6 | 5  | 2 | 2      | 2 | 238 | 238 | 8000 | 60           |
| 197 | 43 | 6 | 10 | 4 | 0      | 2 | 0   | 0   | 8000 | 90           |
| 228 | 44 | 6 | 10 | 4 | 0.021  | 2 | 2   | 2   | 8000 | 90           |
| 196 | 45 | 6 | 10 | 4 | 0.042  | 2 | 4   | 4   | 8000 | 90           |
| 234 | 46 | 6 | 10 | 4 | 0.0565 | 2 | 6   | 6   | 8000 | 90           |
| 195 | 47 | 6 | 10 | 4 | 0.1    | 2 | 12  | 12  | 8000 | 90           |
| 194 | 48 | 6 | 10 | 4 | 0.21   | 2 | 24  | 24  | 8000 | 90           |
| 193 | 49 | 6 | 10 | 4 | 0.42   | 2 | 50  | 50  | 8000 | 90           |
| 192 | 50 | 6 | 10 | 4 | 0.84   | 2 | 100 | 100 | 8000 | 90           |
| 225 | 51 | 6 | 10 | 4 | 2      | 2 | 238 | 238 | 8000 | 90           |
| 207 | 52 | 6 | 20 | 8 | 0      | 2 | 0   | 0   | 8000 | 120          |
| 229 | 53 | 6 | 20 | 8 | 0.021  | 2 | 2   | 2   | 8000 | 120          |
| 206 | 54 | 6 | 20 | 8 | 0.042  | 2 | 4   | 4   | 8000 | 120          |
| 235 | 55 | 6 | 20 | 8 | 0.0565 | 2 | 6   | 6   | 8000 | 120          |
| 205 | 56 | 6 | 20 | 8 | 0.1    | 2 | 12  | 12  | 8000 | 120          |
| 204 | 57 | 6 | 20 | 8 | 0.21   | 2 | 24  | 24  | 8000 | 120          |
| 203 | 58 | 6 | 20 | 8 | 0.42   | 2 | 50  | 50  | 8000 | 120          |
| 202 | 59 | 6 | 20 | 8 | 0.84   | 2 | 100 | 100 | 8000 | 120          |
| 226 | 60 | 6 | 20 | 8 | 2      | 2 | 238 | 238 | 8000 | 120          |
| 85  | 61 | 6 | 0  | 0 | 0      | 0 | 0   | 0   | 2000 | 60           |
| 111 | 62 | 6 | 0  | 0 | 0.5    | 0 | 17  | 17  | 2000 | 60           |
| 109 | 63 | 6 | 0  | 0 | 1      | 0 | 35  | 35  | 2000 | 60           |
| 112 | 64 | 6 | 0  | 0 | 1.5    | 0 | 52  | 52  | 2000 | 60           |
| 128 | 65 | 6 | 0  | 0 | 2      | 0 | 68  | 68  | 2000 | 60           |
| 129 | 66 | 6 | 0  | 0 | 2.5    | 0 | 85  | 85  | 2000 | 60           |
|     |    |   |    |   |        |   |     |     |      | 4.56 $\mu$ s |

## 2. Convergence of the Dielectric Constant

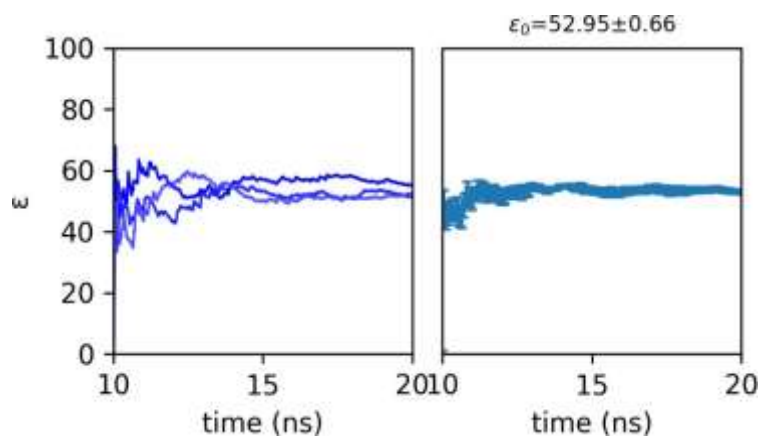

Figure S1 – The convergence of the dielectric constant for the system under an electric field of 8V and an ionic concentration of 2M. (a) shows the results for three individual simulations and (b) presents the average, with the error represented as bars gradually decreasing as the simulations converge.

### 3. Distribution of the water dipole in the x-direction of the surface

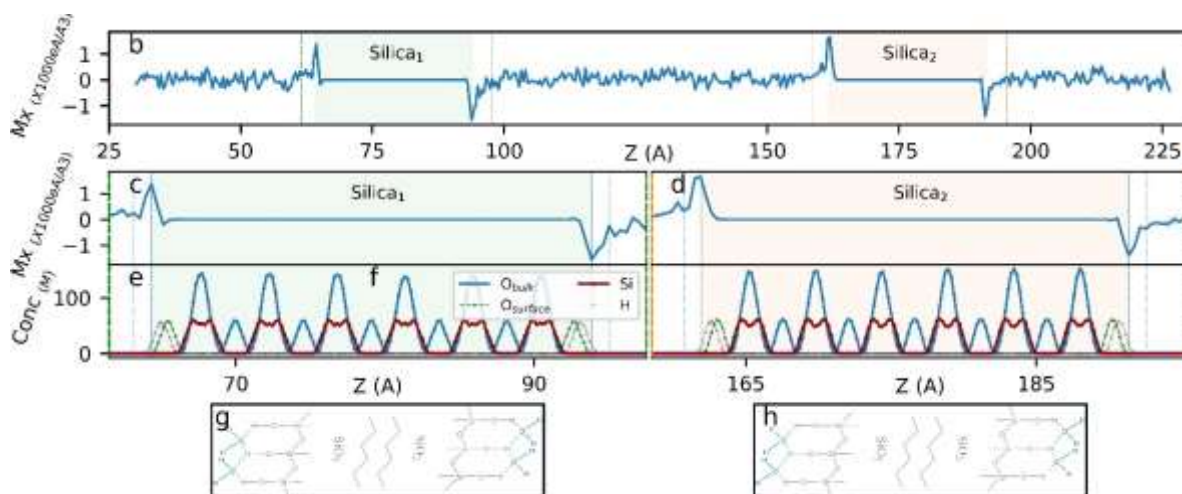

Figure S2 - The distribution of the x-component ( $M_x$ ) of water molecules between two uncharged silica surfaces highlights the importance of hydrogen-bonds in orientation of water molecules. (a)  $M_x$  distribution along the z direction. Magnified view of  $M_x$  at the interface with (c) silica<sub>1</sub> (green highlighted in panel a) and (d) silica<sub>2</sub> (orange highlighted in panel) and various components of (e) silica<sub>1</sub> and (f) silica<sub>2</sub> illustrating (g) and (h) the water molecule dipoles orienting outwards from the surface. Errors are shown as shades around plotted values.

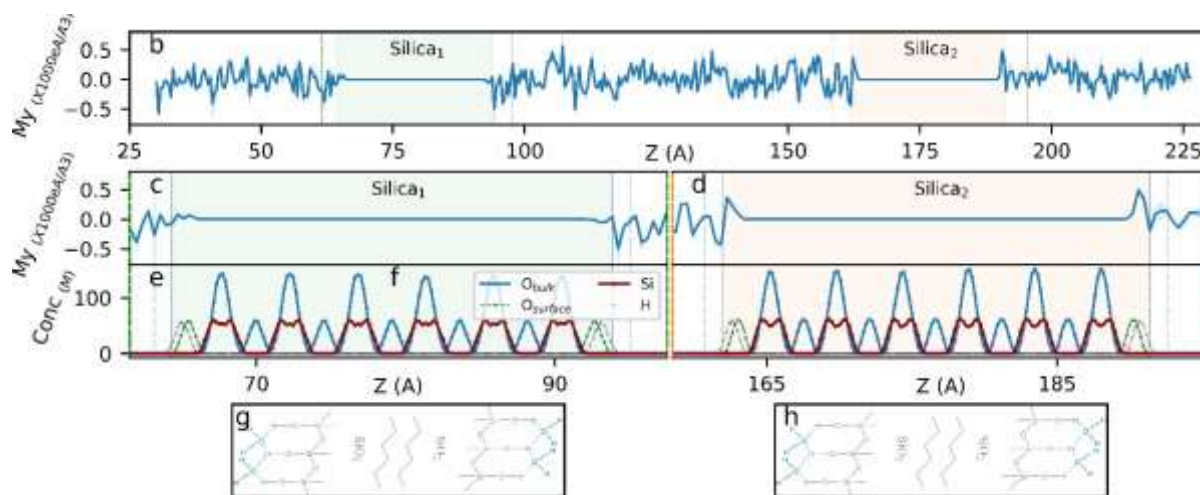

Figure S3 - The distribution of the y-component ( $M_y$ ) of water molecules between two uncharged silica surfaces shows no effect of hydrogen bonding in the molecular organization in y direction. (a)  $M_x$  distribution along the z direction. Magnified view of  $M_x$  at the interface with (c) silica<sub>1</sub> (green highlighted in panel a) and (d) silica<sub>2</sub> (orange highlighted in panel) and various components of (e) silica<sub>1</sub> and (f) silica<sub>2</sub> illustrating no preferred water orientation near the silica surface in the y direction. (g) and (h) arrangement of water molecules near the silica surfaces.

#### 4. Water dipole and ionic distributions in the gap at different applied voltages

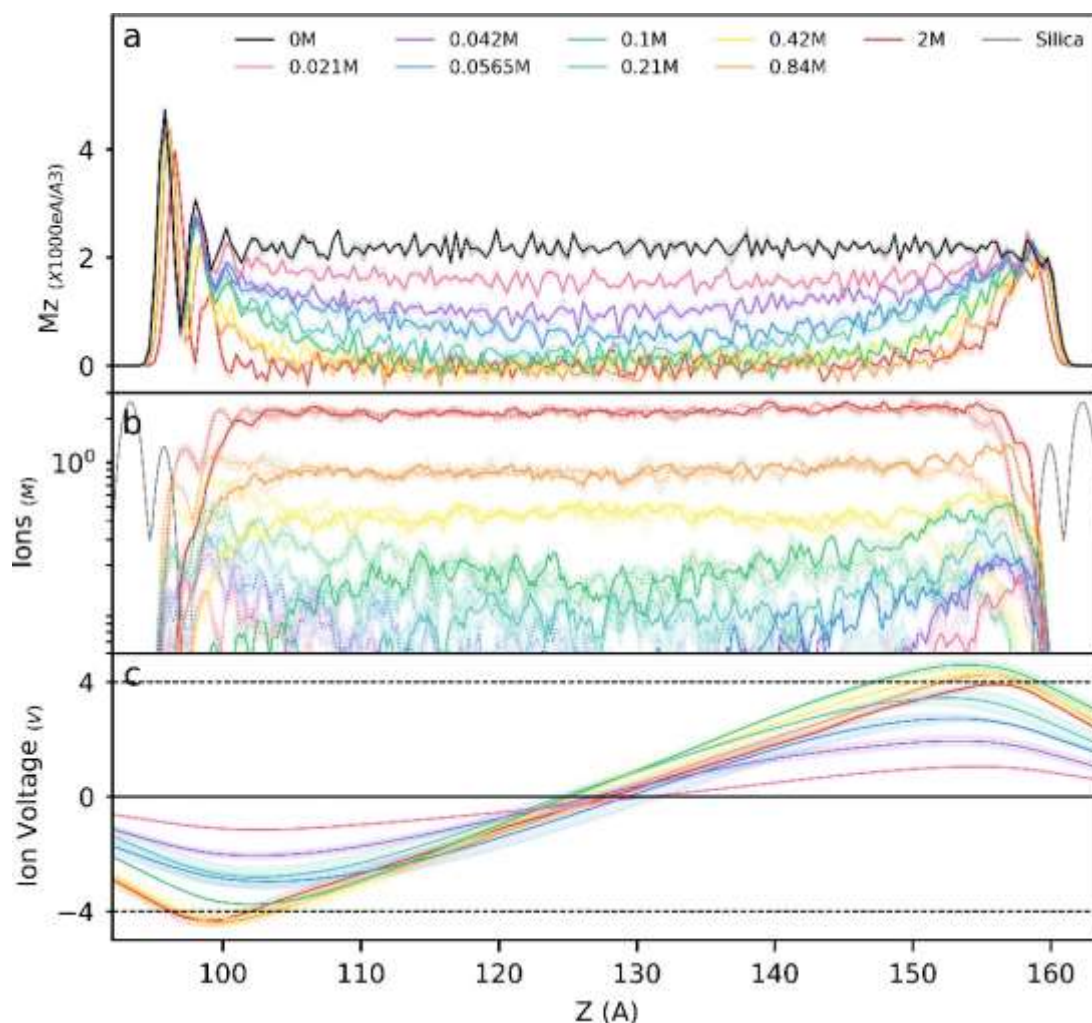

Figure S4 - The water dipole and ions distribution across the box, together with the amount of voltage screened under the externally applied 8 V. (a) The z-component of the water dipole ( $M_z$ ), (b) local cation (solid line) and anion (dotted lines) concentrations and (c) ion-induced voltage distribution along the coordinate perpendicular to the silica plates ( $z$ ). Errors are depicted as shades around the plots.

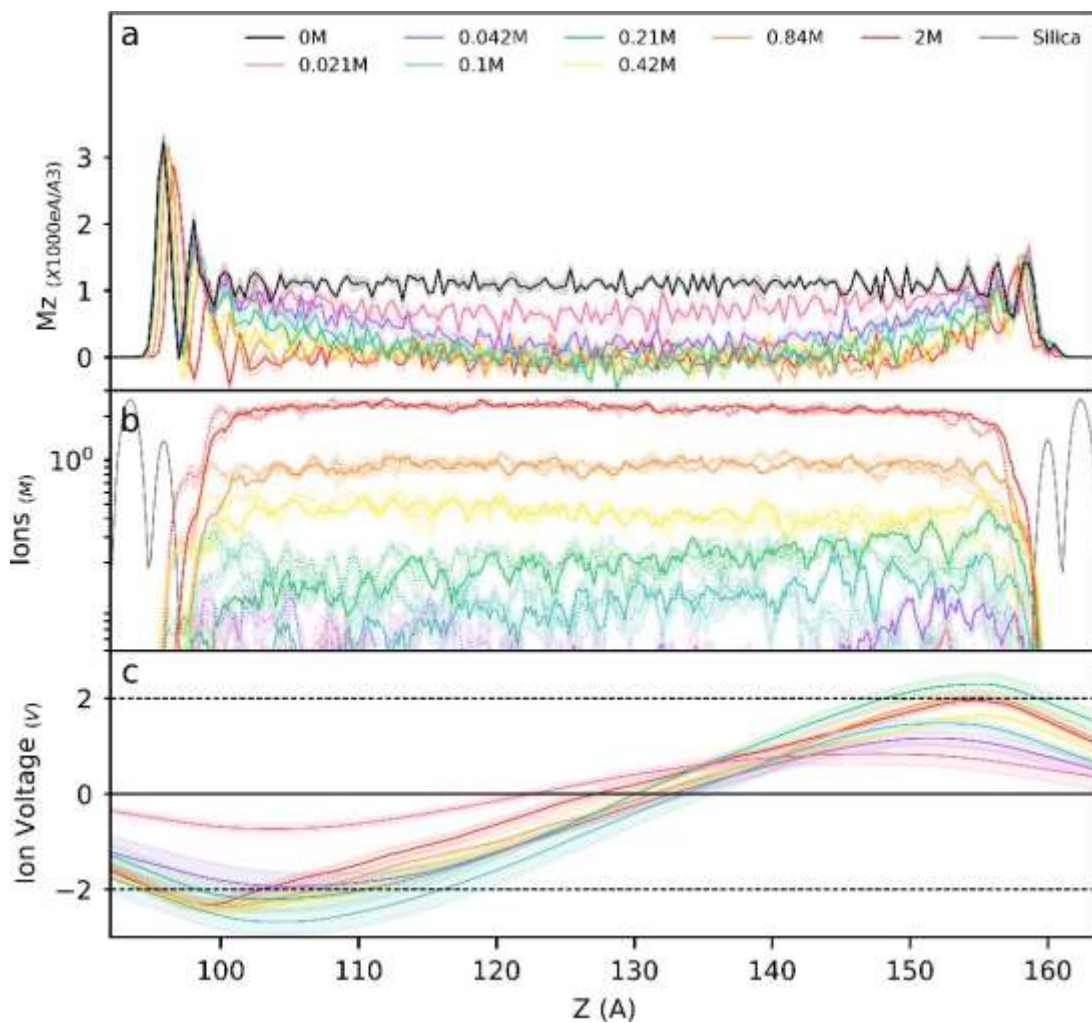

Figure S5 - The water dipole and ions distribution across the box, together with the amount of voltage screened under the externally applied 4 V. (a) The z-component of the water dipole ( $M_z$ ), (b) local cation (solid line) and anion (dotted lines) concentrations and (c) ion-induced voltage distribution along the coordinate perpendicular to the silica plates ( $z$ ). Errors are depicted as shades around the plots.

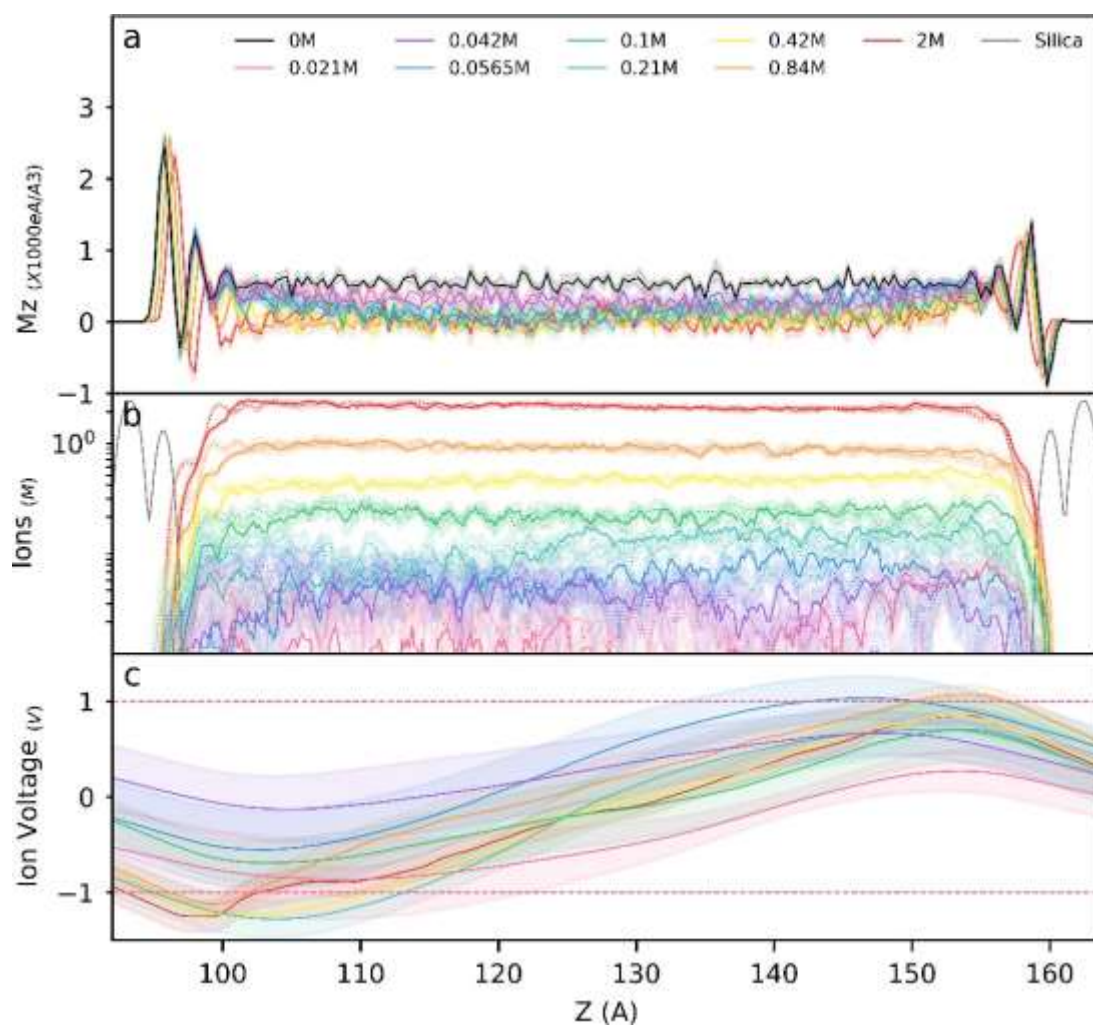

Figure S6 - The water dipole and ions distribution across the box, together with the amount of voltage screened under the externally applied 2 V. (a) The z-component of the water dipole ( $M_z$ ), (b) local cation (solid line) and anion (dotted lines) concentrations and (c) ion-induced voltage distribution along the coordinate perpendicular to the silica plates ( $z$ ). Errors are depicted as shades around the plots.



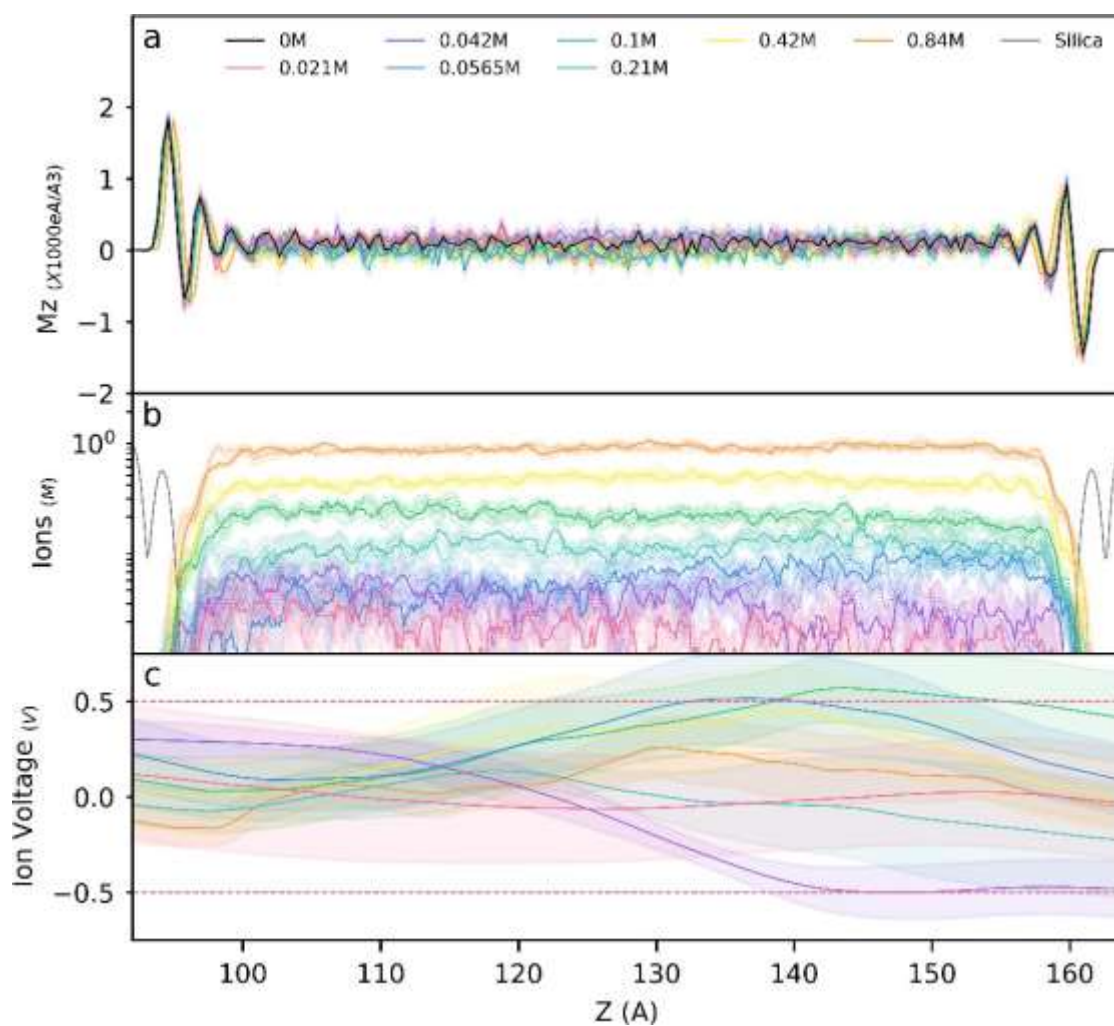

Figure S7 - The water dipole and ions distribution across the box, together with the amount of voltage screened under the externally applied 0.4 V. (a) The z-component of the water dipole ( $M_z$ ), (b) local cation (solid line) and anion (dotted lines) concentrations and (c) ion-induced voltage distribution along the coordinate perpendicular to the silica plates ( $z$ ). Errors are depicted as shades around the plots.

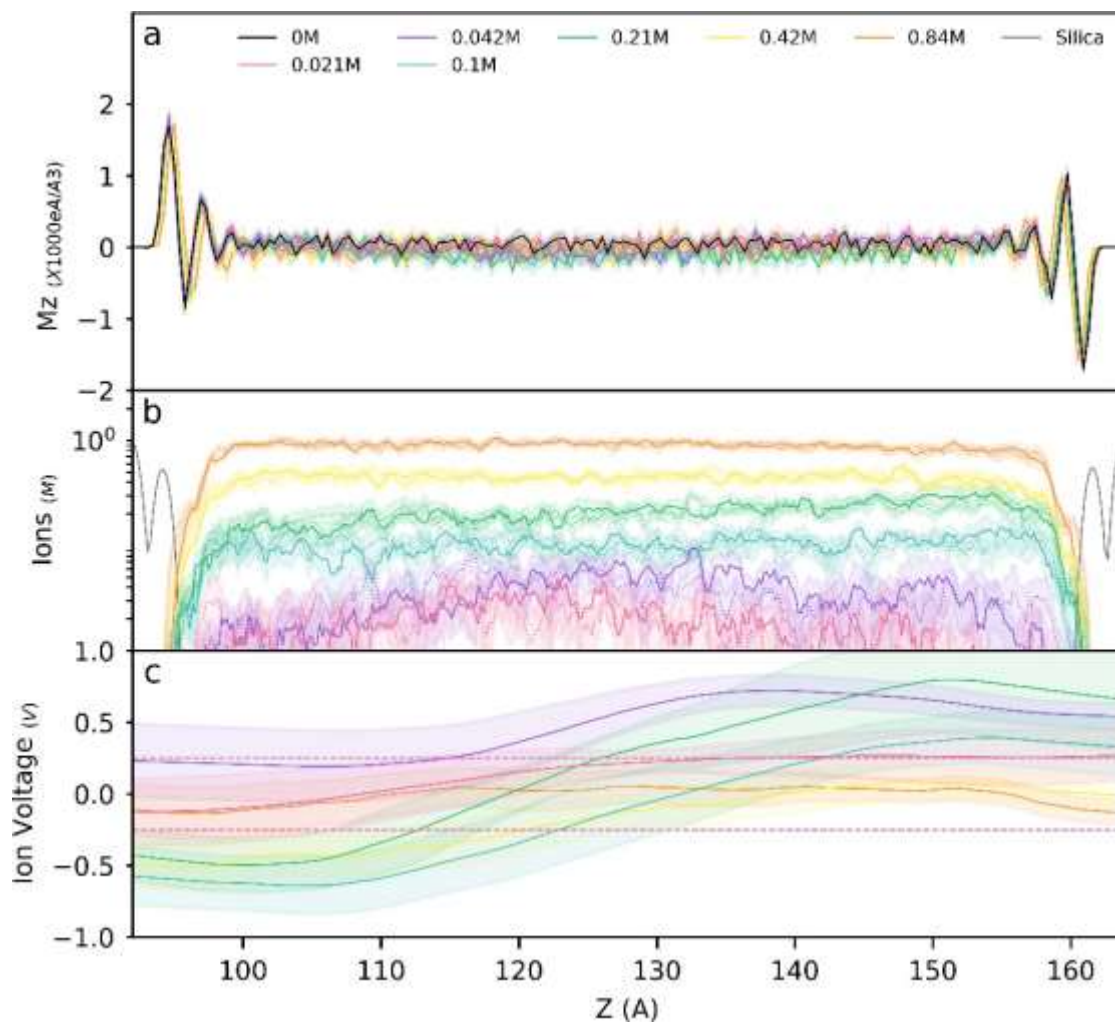

Figure S8 - The water dipole and ions distribution across the box, together with the amount of voltage screened under the externally applied 0.2 V. (a) The z-component of the water dipole ( $M_z$ ), (b) local cation (solid line) and anion (dotted lines) concentrations and (c) ion-induced voltage distribution along the coordinate perpendicular to the silica plates ( $z$ ). Errors are depicted as shades around the plots.

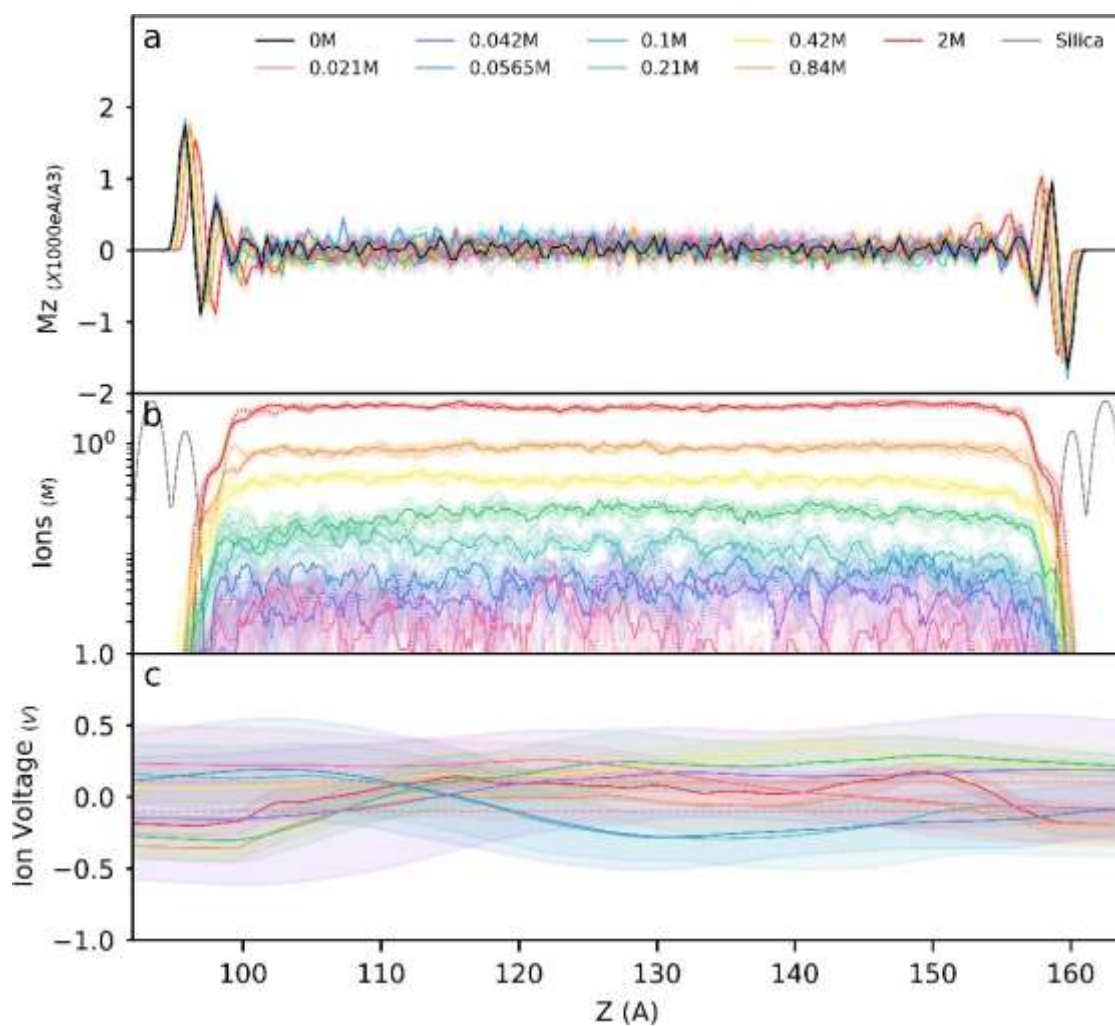

Figure S9 - The water dipole and ions distribution across the box, together with the amount of voltage screened under the externally applied 0.08 V. (a) The z-component of the water dipole ( $M_z$ ), (b) local cation (solid line) and anion (dotted lines) concentrations and (c) ion-induced voltage distribution along the coordinate perpendicular to the silica plates ( $z$ ). Errors are depicted as shades around the plots.

## 5. Water dipole and ionic distributions in the gap at different ionic concentrations

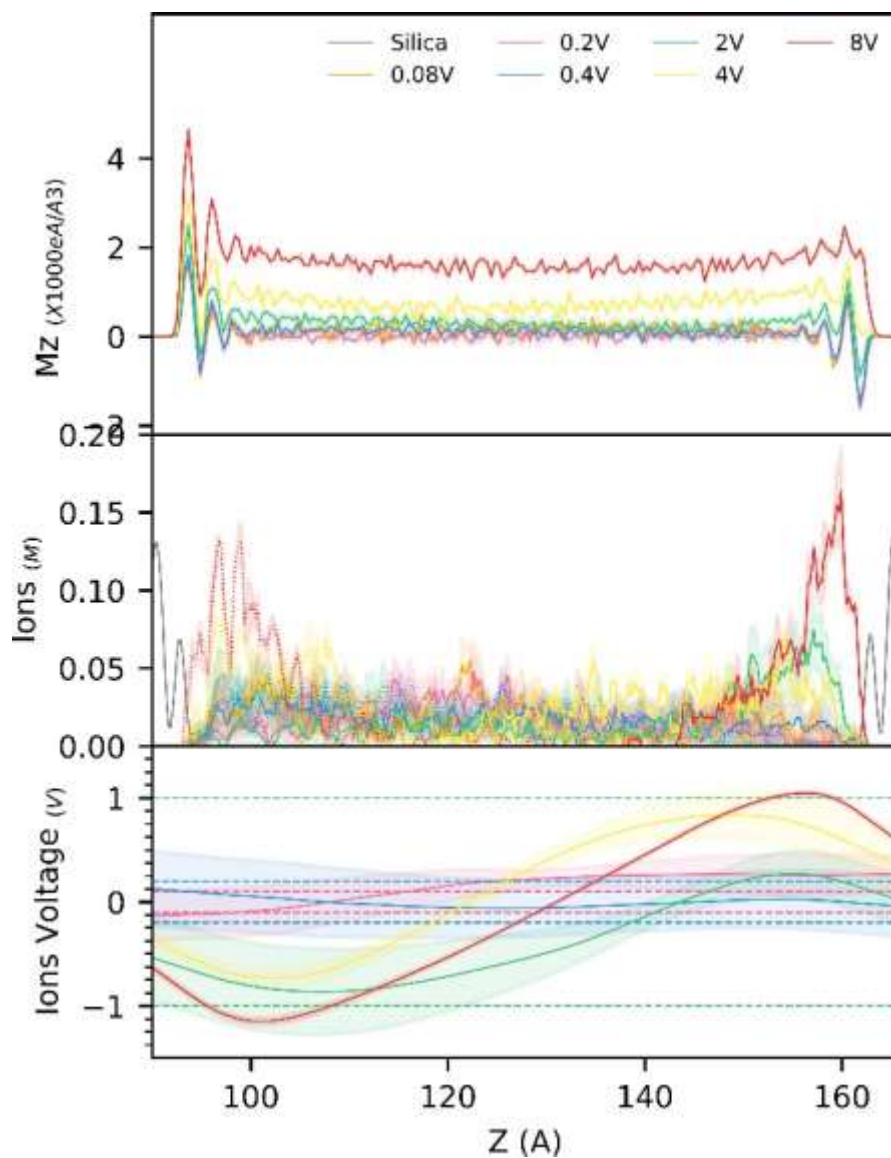

Figure S10 - The water dipole and ions distribution across the box, together with the amount of voltage screened by ions for ionic concentration of 0.021 M. (a) The z-component of the water dipole ( $M_z$ ), (b) local cation (solid lines) and anion (dotted lines) concentrations and (c) ions voltage distribution along the coordinate perpendicular to the silica plates (z). Errors are depicted as shades around the plots.

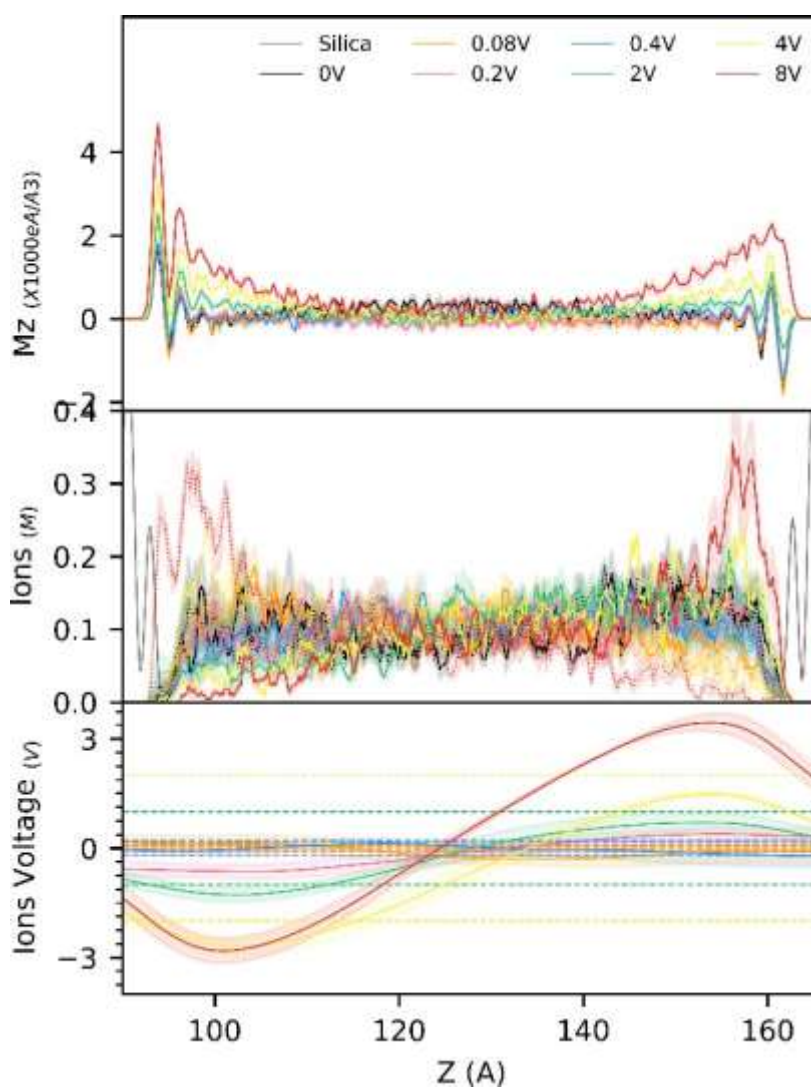

Figure S11 - The water dipole and ions distribution across the box, together with the amount of voltage screened by ions for ionic concentration of 0.042M. (a) The z-component of the water dipole ( $M_z$ ), (b) local cation (solid lines) and anion (dotted lines) concentrations and (c) ions voltage distribution along the coordinate perpendicular to the silica plates ( $z$ ). Errors are depicted as shades around the plots.

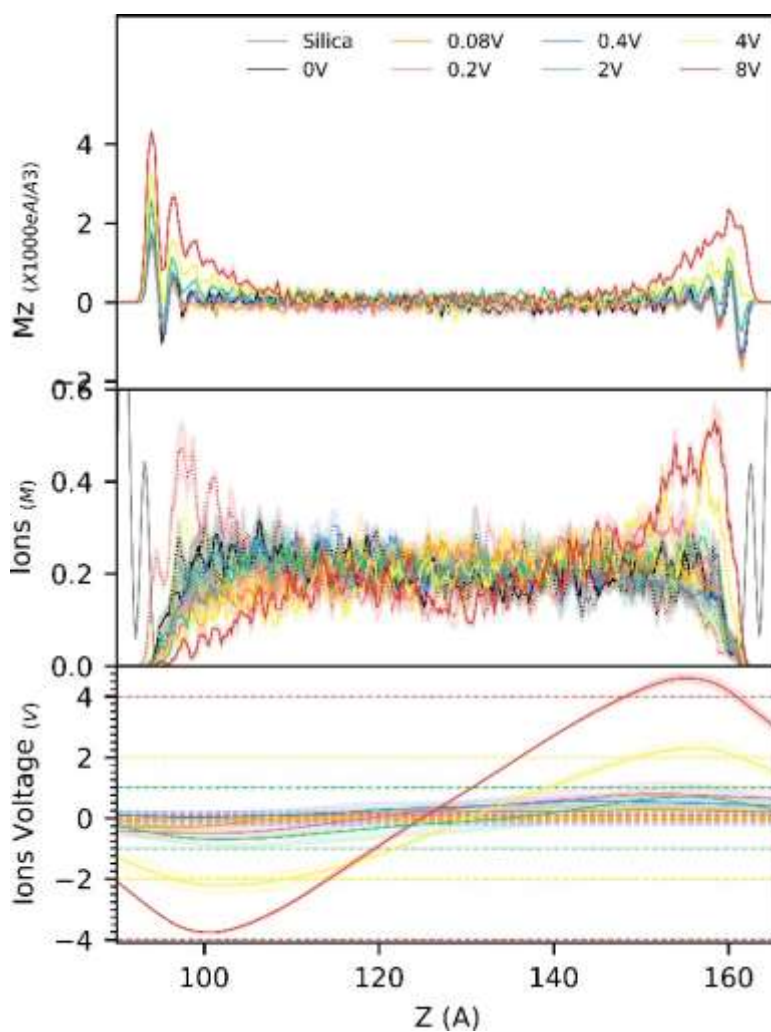

Figure S12 - The water dipole and ions distribution across the box, together with the amount of voltage screened by ions for ionic concentration of 0.21 M. (a) The z-component of the water dipole ( $M_z$ ), (b) local cation (solid lines) and anion (dotted lines) concentrations and (c) ions voltage distribution along the coordinate perpendicular to the silica plates (z). Errors are depicted as shades around the plots.

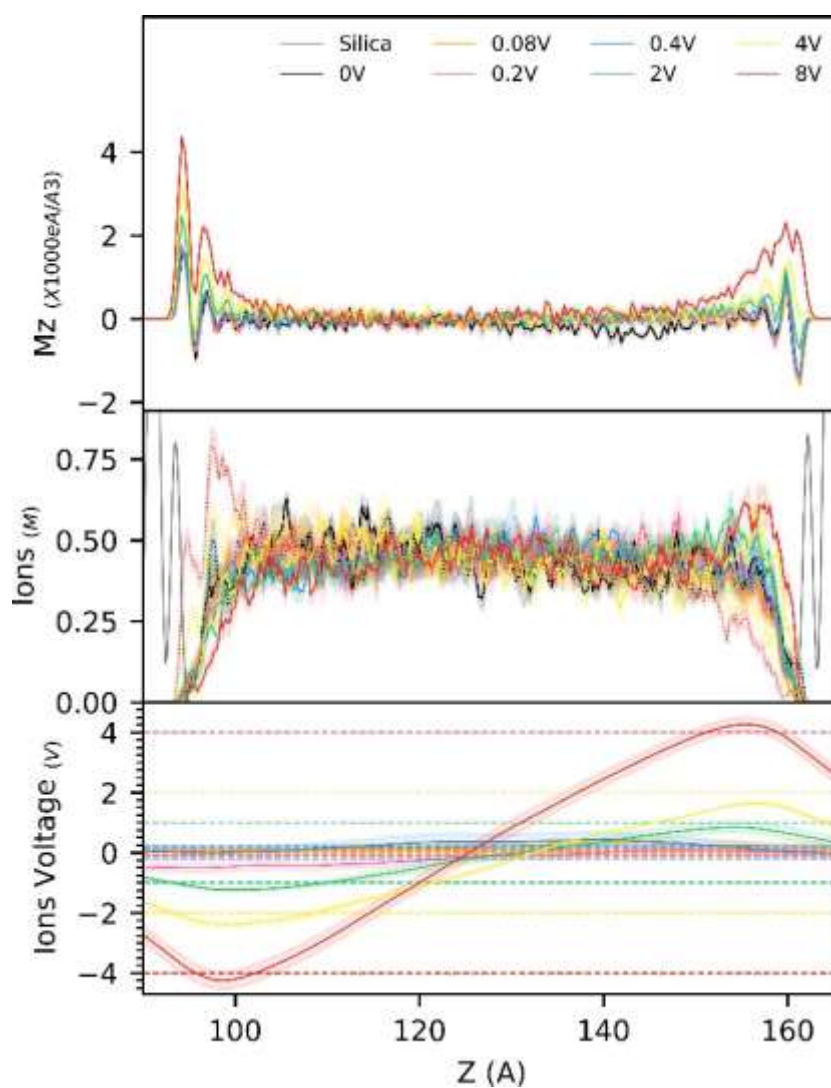

Figure S13 - The water dipole and ions distribution across the box, together with the amount of voltage screened by ions for ionic concentration of 0.42 M. (a) The z-component of the water dipole ( $M_z$ ), (b) local cation (solid lines) and anion (dotted lines) concentrations and (c) ions voltage distribution along the coordinate perpendicular to the silica plates ( $z$ ). Errors are depicted as shades around the plots.

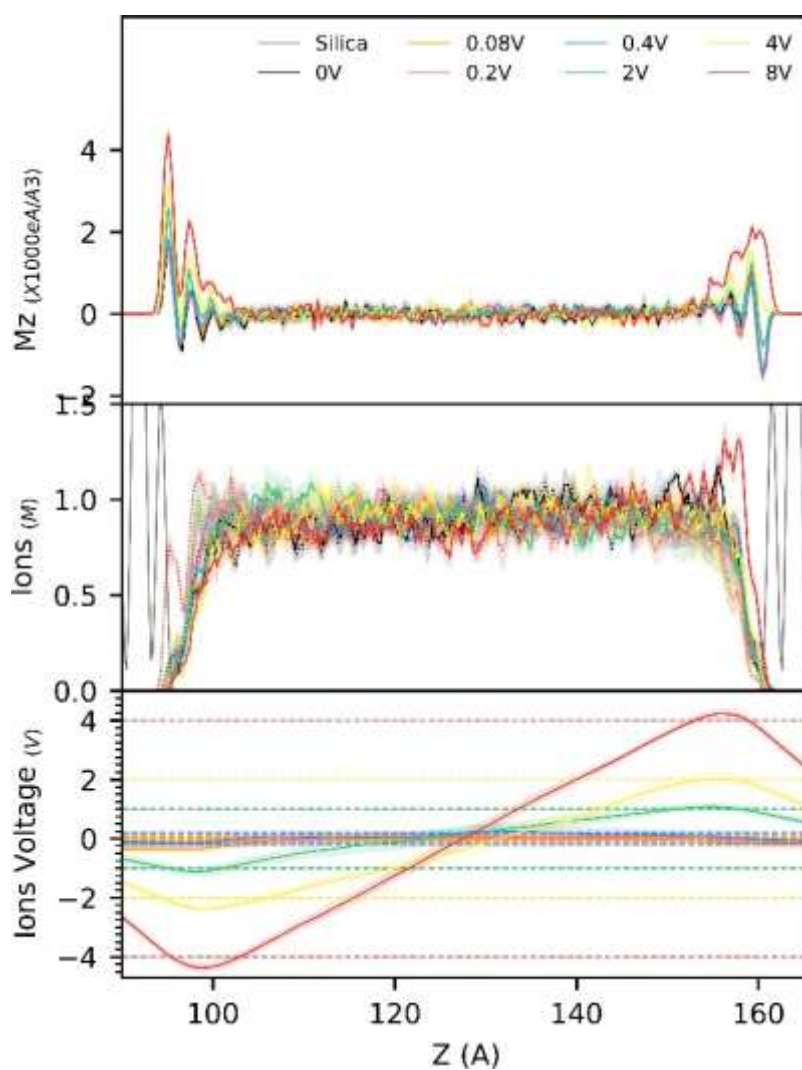

Figure S14 - The water dipole and ions distribution across the box, together with the amount of voltage screened by ions for ionic concentration of 0.84 M. (a) The z-component of the water dipole ( $M_z$ ), (b) local cation (solid lines) and anion (dotted lines) concentrations and (c) ions voltage distribution along the coordinate perpendicular to the silica plates ( $z$ ). Errors are depicted as shades around the plots.



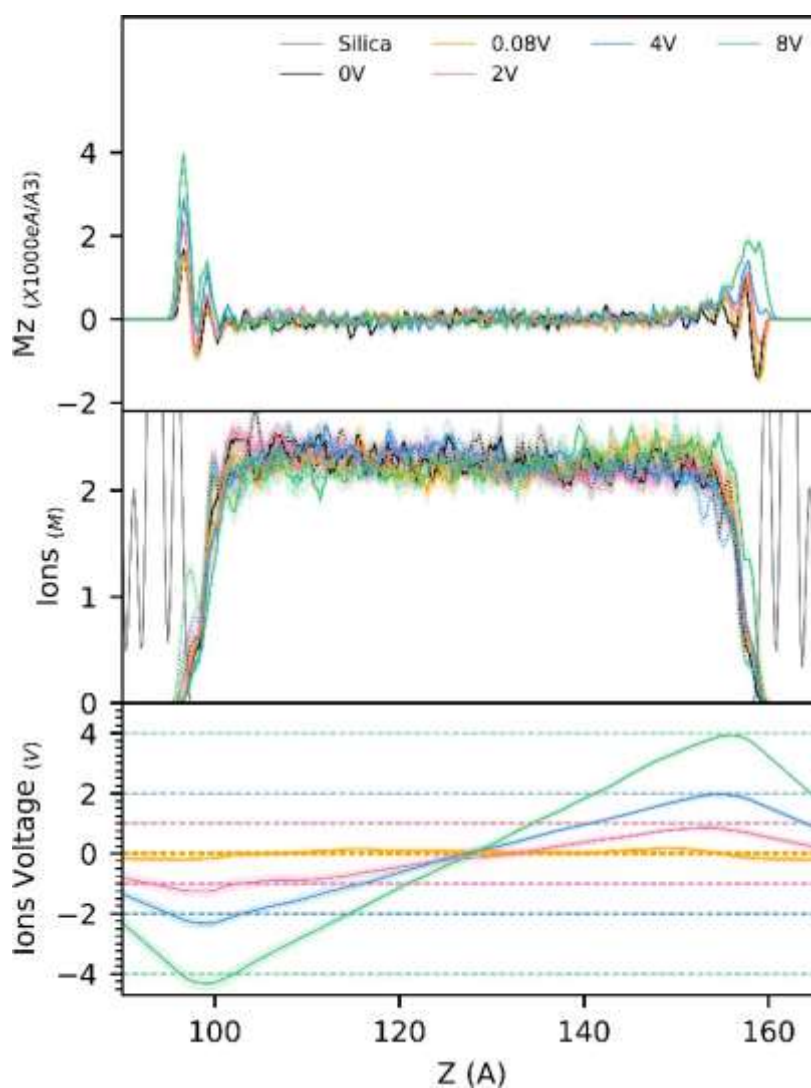

Figure S15 - The water dipole and ions distribution across the box, together with the amount of voltage screened by ions for ionic concentration of 2 M. (a) The z-component of the water dipole ( $M_z$ ), (b) local cation (solid lines) and anion (dotted lines) concentrations and (c) ions voltage distribution along the coordinate perpendicular to the silica plates (z). Errors are depicted as shades around the plots.

## 6. Lateral organisation of water molecules at the surface of silica

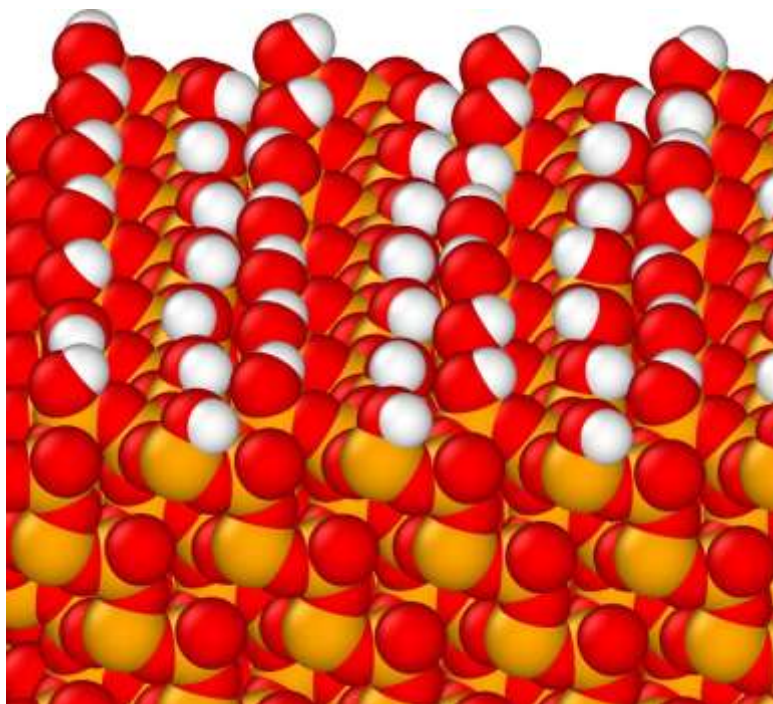

*Figure S16 – Structure of the silica surface considered in the current study. Oxygen, Phosphate and Hydrogen atoms are coloured in red, orange and white respectively.*
